# Supplementary material for: Synchronous intramolecular cycloadditions of the polyene macrolactam polyketide heronamide C
Source: Royal Society of Chemistry journal article supplement (doi:10.1039/c6cc01930g), 2016-01-01
Supplement: c6cc01930g1.pdf [file c6cc01930g1.pdf]

## Supporting Information

# Synchronous intramolecular cycloadditions of the polyene macrolactam polyketide heronamide C

Thomas J. Booth<sup>1</sup>, Silke Alt<sup>1</sup>, Robert J. Capon<sup>2</sup> and Barrie Wilkinson<sup>1\*</sup>

<sup>1</sup>Department of Molecular Microbiology, John Innes Centre, Norwich Research Park,  
Norwich NR4 7UH, UK

<sup>2</sup>Institute for Molecular Bioscience, The University of Queensland, St. Lucia, Queensland,  
Australia 4072

| <b>Table of Contents</b>                                                                                          | <b><u>Page</u></b> |
|-------------------------------------------------------------------------------------------------------------------|--------------------|
| Figure S1-----                                                                                                    | S2                 |
| Figure S2-----                                                                                                    | S3                 |
| Figure S3-----                                                                                                    | S3                 |
| Figure S4-----                                                                                                    | S3                 |
| General Remarks-----                                                                                              | S4                 |
| Chemical Analysis-----                                                                                            | S4                 |
| Analysis of Streptomyces sp. CMB-0406 growth and heronamide production----                                        | S4                 |
| Figure S5-----                                                                                                    | S5                 |
| Production and isolation of heronamides-----                                                                      | S6                 |
| Spontaneous transformation of heronamide C (3) to heronamide A (1)-----                                           | S7                 |
| Figure S6-----                                                                                                    | S7                 |
| Photochemical conversion of heronamide C (3) to heronamide B (2)-----                                             | S8                 |
| Figure S7-----                                                                                                    | S8                 |
| Isolation of genomic DNA from Streptomyces sp. CMB-0406-----                                                      | S9                 |
| Genome sequencing, cluster annotation and bioinformatics analysis-----                                            | S9                 |
| Table S1-----                                                                                                     | S10                |
| Table S2-----                                                                                                     | S10                |
| Table S3-----                                                                                                     | S11                |
| Identification, Organisation and Bioinformatic Analysis of the Heronamide<br>Biosynthetic Gene Cluster (hrn)----- | S11                |
| Table S4-----                                                                                                     | S13                |
| References-----                                                                                                   | S14                |

**Figure S1.** Formation of heronamide A (**1**) from the hypothetical pyrolidinol (**7**) via  $[6\pi + 4\pi]$  cycloaddition and Cope rearrangement of the hypothetical  $[4\pi + 2\pi]$  adduct. <sup>1</sup>

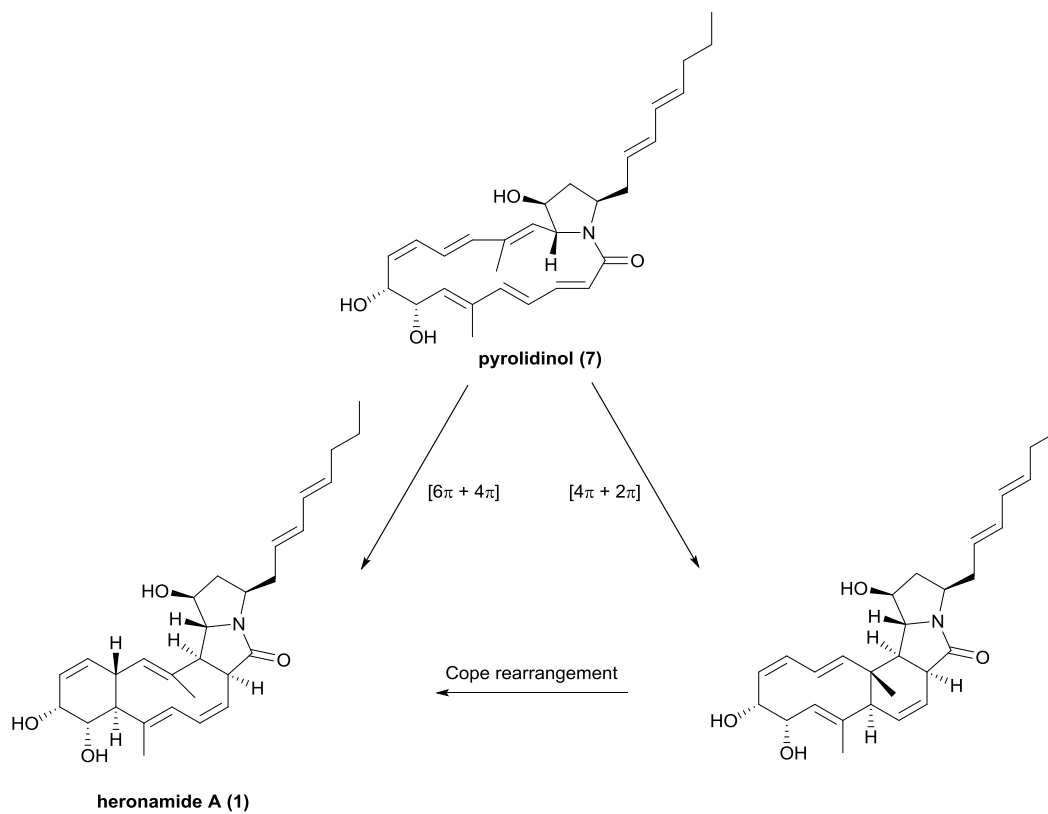

**Figure S2.** Woodward-Hoffman analysis of heronamide A (**1**) and B (**2**) formation. The Woodward Hoffman rules were applied to heronamide C (**3**), the hypothetical pyrrolidinol intermediate (**7**). As the  $\pi$ -systems are not conjugated these reactions were treated as cycloadditions.

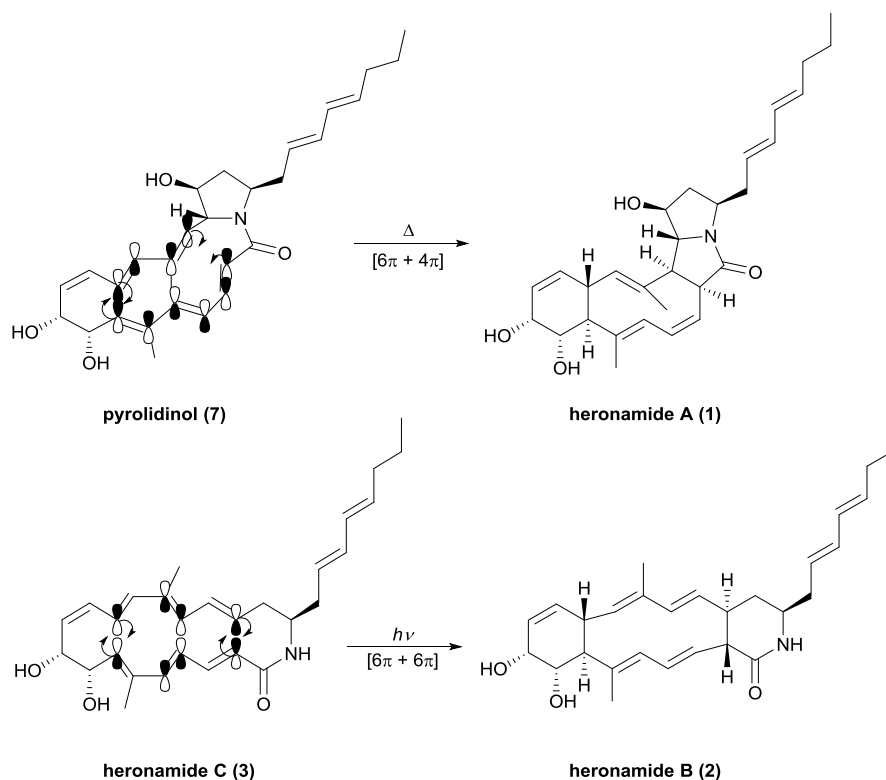

**Figure S3.** Photochemical conversion of ciromycin A to ciromycin B<sup>2</sup>

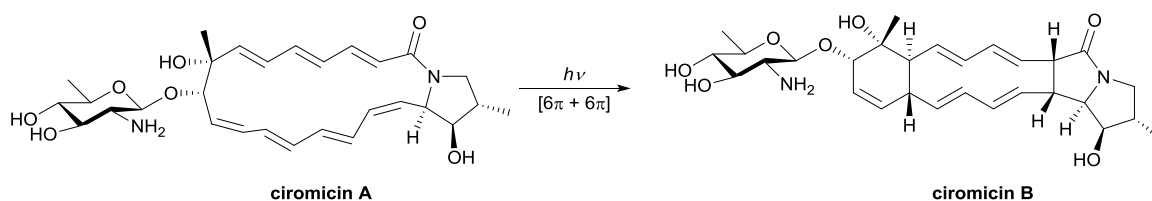

**Figure S4.** Reported structures of ML-449<sup>3</sup> and BE-14106,<sup>4</sup> the C6-C7 olefin (highlighted in red) is a *trans*-double bond.

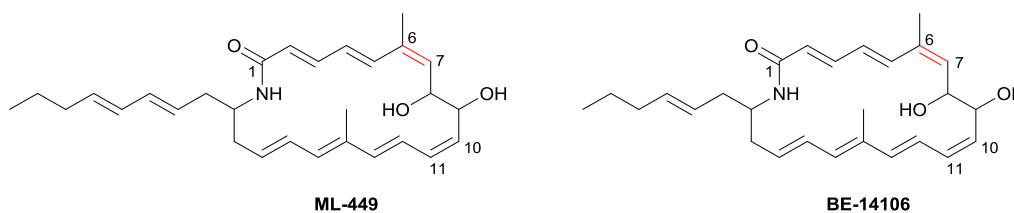

## General Remarks

Unless otherwise stated, all reagents were supplied by Sigma-Aldrich or Fischer Scientific. All solvents were of HPLC grade or equivalent.

## Chemical analysis

Analytical HPLC was performed on an Agilent 1100 series HPLC system with a Gemini-NX C<sub>18</sub> 110A column (150 × 4.6 mm, 3 µm; Phenomenex) using a two-step water-MeOH gradient (10-50% MeOH over 3 min followed by 50-100% over 15 min with a 2 min hold at 100%).

## Analysis of *Streptomyces sp.* CMB-0406 growth and heronamide production

Cultures of *Streptomyces sp.* CMB-0406 were grown in SV2 medium (1.5 % glucose, 1.5 % glycerol, 1.5 % soya peptone, 0.3 % NaCl, 0.1 % CaCO<sub>3</sub>; pH 7.0). Mycelial stocks were streaked on SFM agar (soya flour 2.0 %, mannitol 2.0 %, Lab M No 1 agar 2.0%) and incubated until sporulation at 30 °C. Spore suspensions were produced according to the method described by Kieser *et al.*<sup>5</sup>

A single colony of *Streptomyces sp.* CMB-0406 was used to inoculate 250 ml SV2 seed culture. After 5 days, five Erlenmeyer flasks containing SV2 (400 mL in 2 L flasks) were inoculated with 400 µL seed culture. The cultures were incubated at 30°C and shaken at 250 rpm. Aliquots were taken from each culture every 24 h over a 10 day period. A portion of each sample (5 mL) was dried at 60°C before measuring the mass. The remaining material (1 mL) was centrifuged and the mycelial pellet and supernatant were each extracted separately with EtOAc (1 mL) and the solvent removed under reduced pressure. The resulting material was dissolved in methanol (500 µL) and analysed by HPLC as described above. The data from these experiments are plotted below (Figure S5).

**Figure S5:** Comparison of dry cell weight to heronamide titres during the fermentation of *Streptomyces* sp. CMB-0406.

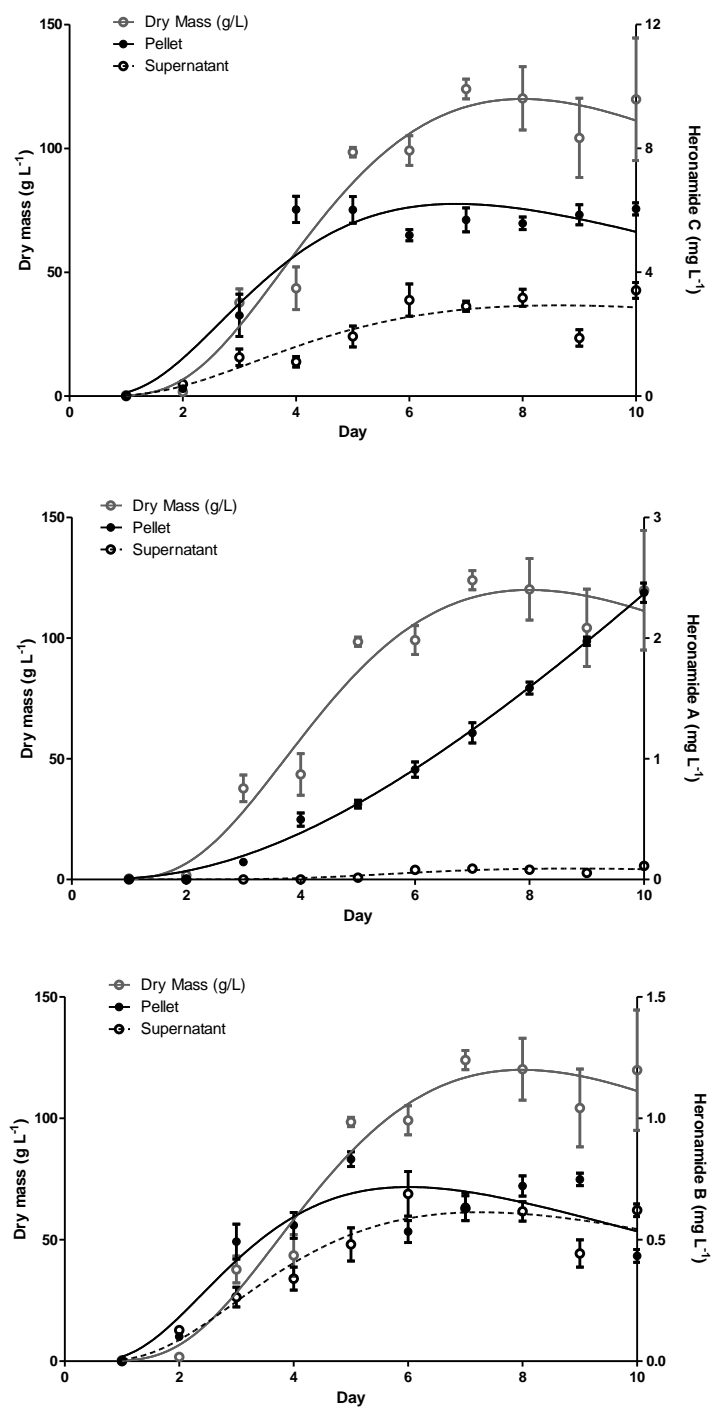

### **Production and isolation of heronamides**

For large scale purification six SV2 cultures (400 mL in 2 L Erlenmeyer flasks) were grown as described above. The resulting broth (2.4 L) was extracted with an equal volume of EtOAc. The phases were separated by centrifugation at 5000 rpm for 15 min and the solvent removed under reduced pressure to yield a yellow extract (1.8 g). This was dissolved in excess methanol (50 mL) and triturated with an equal volume of water. The insoluble fraction (67 mg) was separated and dissolved in methanol and then fractionated by preparative HPLC (see method below) to yield heronamide A (**1**) (1.2 mg), heronamide B (**2**) (0.3 mg) and heronamide C (**3**) (4.8 mg).

Preparative HPLC was performed on an UltiMate 3000 LC system with a Gemini-NX C<sub>18</sub> 110A column (150 × 21.2 mm, 5 µm; Phenomenex) using a two-step MeOH gradient (10-50% MeOH over 5 min followed by 50-100% over 15 min and a 2 min hold at 100%). Typical injection volumes were between 1-1.75 mL and fractions were collected at 10.1-10.4 min (heronamide A, **1**), 11.5 – 12 min (heronamide C, **3**) and 13-13.4 min (heronamide B, **2**). LCMS was performed on a Shimadzu LC-MS platform (equipped with a NexeraX2 liquid chromatograph (LC30AD), a Prominence photo diode array detector (SPD-M20A) and an LCMS-IT-TOF mass spectrometer) with chromatography over a Kinetex C<sub>18</sub> 100A column (100 × 2.1 mm, 2.6 µm; Phenomenex) using a water-MeOH gradient (20-100% MeOH over 12 min with 1 min hold at 100%).

### Spontaneous transformation of heronamide C (3) to heronamide A (1)

Heronamide C (3) was dissolved in methanol containing 10% DMSO at a final concentration of 225  $\mu$ M while minimizing exposure to light. Aliquots (1 mL) were then incubated at 4°C, 30°C and 60°C for 7 days with all light excluded. Samples were then analyzed by HPLC using the method described above and the molar yields for each component calculated by comparison to UV calibration curve generated with isolated material. The data are shown in Figure S6 below.

**Figure S6:** HPLC chromatogram (254 nm) of samples of heronamide C (3) following 7 days incubation at (a) 4°C, (b) 30°C and (c) 60°C.

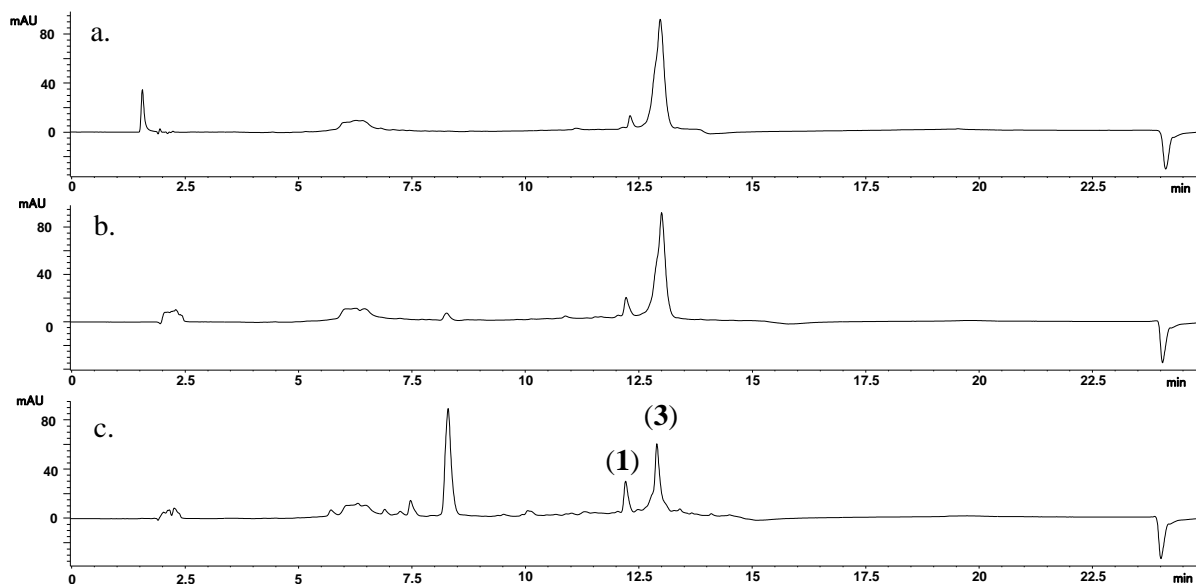

### Photochemical conversion of heronamide C (3) to heronamide B (2)

Heronamide C (3) was dissolved in methanol at a final concentration of 225  $\mu\text{M}$  while minimizing the exposure to light. Aliquots (100  $\mu\text{L}$ ) were then placed into borosilicate vials and incubated under ambient conditions either exposed to bright sunlight by standing on a bench, or placed in a box so that light was excluded and located adjacent to the first sample. After 60 min the samples were analyzed by LCMS and compared to calibration curves of authentic material in order to quantify the species present. Representative chromatograms are shown in Figure S7 below.

**Figure S7:** TIC of heronamide C (3) following 1 h incubation with light excluded (a.) or exposed to ambient light (b.).

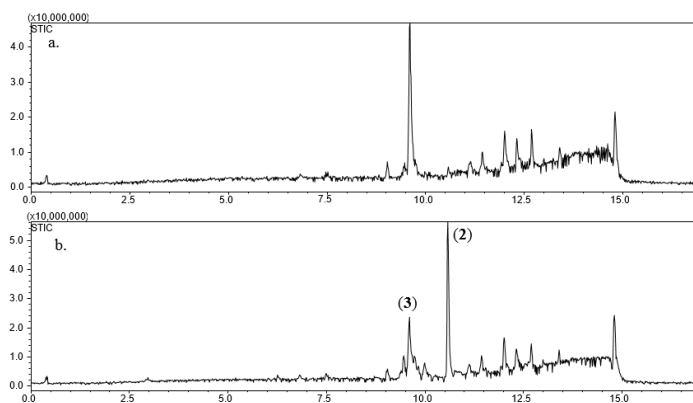

In a second set of experiments aliquots of 3 in methanol (1 mL, 225  $\mu\text{M}$ ) were placed into quartz cuvettes and exposed to varying wavelengths of UV radiation (330, 375, 405 nm) for a range of exposure times (10, 20, 40, 80, 160 s) using an Atlas Photonics LUMOS 43 photoreactor. The photon flux at each wavelength was calculated using ferrioxilate chemical actinometry to allow for normalization across wavelengths. From these data, the half-life, rate constant and quantum yields were determined, the latter using the methods described below:

$$\Phi_{\text{apparent}} = \frac{N_{\text{mole}}}{N_{\text{photons}}}$$

The apparent quantum yield ( $\Phi_{\text{apparent}}$ ) was calculated at different time points with the above equation, where  $N_{\text{mole}}$  represents the number of moles of heronamide B (2) at a given time point.  $N_{\text{photons}}$  represents the number of photons absorbed by heronamide C (3) and was calculated by the following equation.

$$N_{\text{photons}} = q \chi t$$



Where  $q$  is the number of photons delivered to the cuvette per second,  $\chi$  is the proportion of light absorbed by the sample and  $t$  is the exposure time.

### **Isolation of genomic DNA from *Streptomyces* sp. CMB-0406**

High molecular weight genomic DNA was extracted according to the salting out procedure of the *Streptomyces* manual<sup>5</sup> with the modifications as described here: wet mycelium (0.5 mL) from a 30 h old SV2 culture was washed with 10% sucrose (10 mL) before resuspension in SET buffer (5 mL; 75 mM NaCl, 25 mM EDTA, 20 mM TrisHCl pH 8.0) to which lysozyme (200  $\mu$ L; 50 mg/mL) and ribonuclease A (15  $\mu$ L; 10 mg/mL) were added. The cells were incubated overnight at 37°C; fresh lysozyme (300  $\mu$ L) was added after ca. 17 h followed by an additional 2 h incubation. The subsequent steps were performed according to Kieser *et al.*<sup>5</sup>

### **Genome sequencing, cluster annotation and bioinformatics analysis**

Genomic DNA was sequenced with Pacific Biosciences (PacBio) RSII SMRT technology (commissioned to The Genome Analysis Centre (TGAC) Norwich, UK).<sup>6</sup> The assembly obtained five contigs of 8585775 bps, 13002 bps, 11991 bps, 11345 bps, and 10240 bps whereof the biggest contig contained all four smaller contigs. The 8.59 MB contig was therefore submitted to BASys (Bacterial Annotation System), Prodigal to identify protein coding sequences (PCSs), and RAST (Rapid Annotation using Subsystem Technology) to assign putative gene functions.<sup>7,8,9</sup> Putative gene clusters for the biosynthesis of specialised metabolites were identified with antiSMASH 3.0.<sup>10</sup>

**Table S1: General characteristics of the *Streptomyces sp.* CMB-0406 genome**

|                                                                 |            |
|-----------------------------------------------------------------|------------|
| Assembled chromosome size                                       | 8585775 bp |
| Estimated chromosome size                                       | 8691436 bp |
| Estimated terminal inverted repeats (TIR)                       | 115994 bp  |
| Coding DNA                                                      | 7566372 bp |
| Chromosome topology                                             | Linear     |
| Chromosome G+C content                                          | 70.27%     |
| Protein coding sequences (PCS)                                  | 7578       |
| rRNA operons                                                    | 6          |
| tRNA genes                                                      | 64         |
| Putative biosynthetic gene clusters for specialised metabolites | 25         |

**Table S2: COG (Cluster of Orthologous Genes) functional categories of chromosomal protein coding sequences identified in *Streptomyces sp.* CMB-0406 (as calculated by Basys<sup>7</sup>).**

| COG functional categories                                             | Percentage |
|-----------------------------------------------------------------------|------------|
| <b>C</b> Energy production and conversion                             | 8.4        |
| <b>D</b> Cell division and chromosome partitioning                    | 0.7        |
| <b>E</b> Amino acid transport and metabolism                          | 10.4       |
| <b>F</b> Nucleotide transport and metabolism                          | 1.8        |
| <b>G</b> Carbohydrate transport and metabolism                        | 10.2       |
| <b>H</b> Coenzyme metabolism                                          | 3.8        |
| <b>I</b> Lipid metabolism                                             | 5.9        |
| <b>J</b> Translation, ribosomal structure and biogenesis              | 4          |
| <b>K</b> Transcription                                                | 8.4        |
| <b>L</b> DNA replication, recombination and repair                    | 3.3        |
| <b>M</b> Cell envelope biogenesis, outer membrane                     | 4          |
| <b>N</b> Cell motility                                                | 0.2        |
| <b>O</b> Posttranslational modification, protein turnover, chaperones | 2.7        |
| <b>P</b> Inorganic ion transport and metabolism                       | 4.8        |
| <b>Q</b> Secondary structure                                          | 3.1        |
| <b>R</b> General function prediction only                             | 9.5        |
| <b>S</b> COG of unknown function                                      | 3.2        |
| <b>T</b> Signal transduction                                          | 5.9        |
| Unknown                                                               | 6.3        |

**Table S3. Putative biosynthetic gene clusters for specialised metabolites in *Streptomyces* sp. CMB-0406<sup>10</sup>**

| antiSMASH<br>Cluster No. | Gene cluster type       | Position       |                | Gene clusters of compounds<br>with highest similarity (%) |
|--------------------------|-------------------------|----------------|----------------|-----------------------------------------------------------|
|                          |                         | From           | To             |                                                           |
| 1                        | Nrps                    | 61570          | 119251         | Streptolydigin (10%)                                      |
| 2                        | Melanin                 | 353228         | 363716         | Melanin (100%)                                            |
| 3                        | Arylpolyene-Terpene     | 362554         | 411888         | 2-methylisoborneol (100%)                                 |
| 4                        | Terpene-Otherks-T1pks   | 429305         | 487988         | Isorenieratene (85%)                                      |
| 5                        | T3pks                   | 499477         | 540604         | Herboxidiene (2%)                                         |
| 6                        | Nucleoside              | 574155         | 594589         | Reveromycin (9%)                                          |
| 7                        | Nrps                    | 597760         | 648748         | Coelichelin (100%)                                        |
| 8                        | T1pks                   | 737055         | 801594         | Reveromycin (21%)                                         |
| 9                        | Terpene                 | 1035427        | 1056401        | -                                                         |
| 10                       | Terpene                 | 1381714        | 1408492        | Hopene (76%)                                              |
| 11                       | Terpene-Bacteriocin     | 1481394        | 1517147        | -                                                         |
| 12                       | Other                   | 1743111        | 1783809        | Meilingmycin (5%)                                         |
| 13                       | Bacteriocin             | 1893447        | 1904775        | -                                                         |
| 14                       | Siderophore             | 2370109        | 2384856        | -                                                         |
| 15                       | Other                   | 2744569        | 2785783        | Stambomycin (16%)                                         |
| 16                       | Nrps-Lantipeptide-T1pks | 3967300        | 4046374        | Guadinomine (11%)                                         |
| 17                       | Terpene                 | 4634133        | 4656319        | Lipstatin (14%)                                           |
| 18                       | Nrps                    | 6824991        | 6871418        | -                                                         |
| 19                       | Ectoine                 | 6930581        | 6940979        | Ectoine (75%)                                             |
| 20                       | Lasso peptide           | 7375142        | 7397656        | SSV-2083 (62%)                                            |
| 21                       | Otherks-T1pks           | 7491509        | 7544137        | -                                                         |
| <b>22</b>                | <b>T1pks</b>            | <b>7641469</b> | <b>7758787</b> | <b>Heronamide cluster<br/>BE-14106 (96%)</b>              |
| 23                       | T3pks                   | 7942737        | 7983846        | Alkylresorcinol (66%)                                     |
| 24                       | Lantipeptide            | 8037336        | 8068867        | Meilingmycin (2%)                                         |
| 25                       | T3pks                   | 8139618        | 8180721        | Herboxidiene (3%)                                         |

### Identification, Organisation and Bioinformatic Analysis of the Heronamide Biosynthetic Gene Cluster (BSGC) (*hrn*)

Two of the twenty-five clusters were identified as type-I polyketide synthase clusters, of which the heronamide BSGC was readily identifiable due to high similarity (96%) with the BE-14106 BSGC.<sup>11</sup> The heronamide BSGC was analyzed in detail using Artemis for visualization and annotation;<sup>12</sup> gene function was assigned based on a combination of searches with BLAST at NCBI server,<sup>13</sup> Pfam at Sanger server,<sup>14</sup> and Conserved Domain Database (CDD) at NCBI server;<sup>15</sup> modules and domains of the polyketide synthase were assigned on the basis of Pfam, CDD and antiSMASH search output. The frame Plot function of Artemis was used to confirm the extent of PCSs and for identification of putative frame-shifts due to errors in the sequence.<sup>16</sup> One obvious frame-shift was identified causing the split of the PKS gene *hrnB* in two; in comparison with the amino acid sequences of the ML-449 and BE-14106 biosynthetic gene

cluster, a missing G causing the frame-shift was identified. The sequence of the heronamide biosynthetic gene cluster has been deposited in the European Nucleotide Archive under the accession number LT548273. The *hrn* gene cluster spans 80166 base pairs and bioinformatic analysis identified 21 genes, *hrnA* to *hrnQ*. Predicted protein sequences for the ketoreductase and dehydratase domains of the polyketides, heronamide C, ML-449 (FJ872525.1), vicensistatin (AB086653.1), hitachimycin (LC008143.1), BEC-14106 (FJ872523.1), incednine (AB767280.1), cremimycin (AB818354.1), bacillaene (AJ634060.2), rifamycin (AJ223012.1), rhizoxin (AM411073.1), and rapamycin (X86780.1) were extracted from their antismash 3.0 outputs and aligned, respectively, using clustalW2.<sup>17</sup> The alignment revealed that all heronamide KR domains were canonical B-type KR domains<sup>18</sup> containing the conserved LDD motif and P144 and N148 residues with the exception of the KR domain in module 4 of the macrolactam PKS responsible for the C10-C11 *cis*-double bond where the LDD sequence was replaced by VDN and the substitution of alanine at position 144; this was assigned as an A-type KR domain. The KR domain of module 6 in the ML-449 BSGC was 98.9% identical to its counterpart in the heronamide BSGC strongly indicating that the assignment of a C6-C7 *cis*-double bond is erroneous. In addition, our analysis supports the findings of Zhu *et al.*<sup>19</sup> who reported the absence of a ‘shift module,’ in the heronamide F BSGC. Furthermore, there is no consistent phylogenetic signal and as such, the basis of the  $\alpha\beta - \beta\gamma$  double bond shifts remains unclear.

**Table S4: Description of proteins encoded in genes identified in the heronamide biosynthetic gene cluster, proposed function, and homologs**

| Protein | size (aa) | Proposed function                                     | % Similarities/ % Identities<br>Homolog from |                               |                          |
|---------|-----------|-------------------------------------------------------|----------------------------------------------|-------------------------------|--------------------------|
|         |           |                                                       | ML-449 cluster <sup>x</sup>                  | BE-14106 cluster <sup>x</sup> | her cluster <sup>x</sup> |
| HrnH    | 950       | LuxR-type transcriptional regulator                   | MlaH<br>98/95                                | BecH<br>94/88                 | HerH<br>74/64            |
| HrnA1   | 6334      | Polyketide synthase type I                            | MlaA1<br>96/94                               | BecA<br>90/86                 | HerA1<br>74/64           |
| HrnA2   | 1043      | Polyketide synthase type I                            | MlaA2<br>98/97                               | BecA<br>84/77                 | HerA2<br>83/76           |
| HrnI    | 363       | Glycine oxidase/FAD-dependent oxidoreductase          | MlaI<br>95/93                                | BecI<br>88/79                 | HerI<br>83/73            |
| HrnC    | 695       | Polyketide synthase type I                            | MlaC<br>97/95                                | BecC<br>90/84                 | HerC<br>84/75            |
| HrnU    | 187       | putative NRPS accessory protein                       | MlaU<br>100/99                               | BecU<br>95/89                 | HerU<br>88/81            |
| HrnB    | 3526      | Polyketide synthase type I                            | MlaB<br>96/95                                | BecB<br>92/87                 | HerB<br>85/78            |
| HrnJ    | 532       | putative AMP-dependent acyl-CoA synthetase/ ligase    | MlaJ<br>97/97                                | Bec<br>92/87                  | HerJ<br>87/79            |
| HrnK    | 313       | Acyltransferase                                       | MlaK<br>97/96                                | Bec<br>90/84                  | HerK<br>85/77            |
| HrnS    | 78        | Peptidyl carrier protein                              | MlaS<br>98/95                                | BecS<br>94/92                 | HerS<br>91/82            |
| HrnL    | 504       | NRPS adenylation domain                               | MlaL<br>96/94                                | BecL<br>89/83                 | HerL<br>89/81            |
| HrnM    | 199       | TetR-type transcriptional regulator                   | MlaM<br>98/96                                | BecM<br>89/86                 | HerM<br>87/81            |
| HrnN    | 523       | MFS-type efflux pump                                  | MlaN<br>97/95                                | BecN<br>93/87                 | HerN<br>85/77            |
| HrnO    | 411       | P450 monooxygenase                                    | MlaO<br>98/96                                | BecO<br>95/91                 | HerO<br>87/76            |
| HrnD    | 3368      | Polyketide synthase type I                            | MlaD<br>96/95                                | BecD<br>92/88                 | HerD<br>83/77            |
| HrnP    | 311       | Putative L-amino acid amidase/ proline iminopeptidase | MlaG<br>98/98                                | BecP<br>91/83                 | HerP<br>90/83            |
| HrnG    | 2001      | Polyketide synthase type I                            | MlaG<br>95/94                                | BecG<br>89/85                 | HerG<br>80/72            |
| HrnF    | 3382      | Polyketide synthase type I                            | MlaF<br>97/94                                | BecF<br>93/88                 | HerF<br>84/76            |
| HrnE    | 1637      | Polyketide synthase type I                            | MlaE<br>95/93                                | BecE<br>91/87                 | HerE<br>81/72            |
| HrnT    | 88        | SimX-like protein                                     | MlaT<br>92/90                                | BecT<br>80/75                 | ---                      |
| HrnQ    | 256       | Thioesterase type II                                  | MlaQ<br>98/96                                | BecQ<br>93/86                 | ---                      |

## References

1. P. Yu, A. Patel and K. N. Houk, *J. Am. Chem. Soc.*, 2015, **137**, 13518–13523.
2. D. K. Derewacz, B. C. Covington, J. A. McLean and B. O. Bachmann, *ACS Chem Biol.*, 2015, **18**, 1998-2006.
3. H. Jørgensen, K. F. Degnes, A. Dikiy, E. Fjærvik, G. Klinkenberg and S. B. Zotchev, *Appl. Environ. Microbiol.* 2010, **76**, 283–293.
4. K. Kojiri, S. Nakajima, H. Suzuki, H. Kondo and H. Suda, *J. Antibiot.*, 1992, **45**, 868–74; H. Jørgenson, K. F. Degnes, H. Sletta, E. Fjærvik, A. Dikiy, L. Ferfindal, P. Bruheim, G. Klinkenberg, H. Bredholt, G. Nygård, S. O. Døskeland, T. E. Ellingsen and S. B. Zotchev, *Chem. Biol.*, 2009, **16**, 1109-1121.
5. T. Kieser, M. J. Bibb, M. J. Buttner, K. F. Chater and D. A. Hopwood, *Practical Streptomyces Genetics*. 2000, Norwich, UK. John Innes Foundation.
6. J. Eid *et al.*, *Science*, 2009, **323**, 133-138.
7. G. H. Van Domselaar, P. Stothard S. Shrivastava, J. A. Cruz, A. Guo, X. Dong, P. Lu, D. Szafron, R. Greiner and D. S. Wishart, *Nucleic Acids Res.* 2005, **33**, 455-459.
8. D. Hyatt, G. –L. Chen, P. F. Locascio, M. L. Land, F. W. Larimer and L. J. Hauser, *BMC Bioinformatics* 2010, **11**, 119.
9. R. K. Aziz *et al.*, *BMC genomics*, 2009, **9**, 75.
10. T. Weber, K. Blin, S. Duddela, D. Krug, H. U. Kim, R. Brucoleri, S. Y. Lee, M. A. Fischbach, R. Müller, W. Wohlleben, R. Breitling, E. Takano and M. H. Medema, *Nucleic Acids Res.* 2015, DOI: 10.1093/nar/gkv437.
11. H. Jørgensen, K. F. Degnes, H. Sletta, E. Fjærvik, A. Dikiy, L. Herfindal, P. Bruheim, G. Klinkenberg, H. Bredholt, G. Nygård, S. O. Døskeland, T. E. Ellingsen and S. B. Zotchev, *Chem Biol.*, 2009, **16**, 1109-1121.
12. K. Rutherford, J. Parkhill, J. Crook, T. Horsnell, P. Rice, M. A. Rajandream and B. Barrell, *Bioinformatics* 2000, **16**, 944-945.
13. S. F. Altschul, T. L. Madden, A. A. Schäffer, J. Zhang, Z. Zhang, W. Miller and D. J. Lipman, *Nucleic Acids Res.* 1997, **25**, 3389-3402.
14. R. D. Finn, A. Bateman, J. Clements, P. Coghill, R. Y. Eberhardt, S. R. Eddy, A. Heger, K. Hetherington, L. Holm, J. Mistry, E. L. L. Sonnhammer, J. Tate, and M. Punta, *Nucleic Acids Res.* 2014, **42**, 222-230.
15. A. Marchler-Bauer, M. K. Derbyshire, N. R. Gonzales, S. Lu, F. Chitsaz, L. Y. Geer, R. C. Geer, J. He, M. Gwadz, D. I. Hurwitz, C. J. Lanczycki, F. Lu, G. H. Marchler, J. S. Song, N. Thanki, Z. Wang, R. A. Yamashita, D. Zhang, C. Zheng and S. H. Bryant, *Nucleic Acids Res.* 2015, **43**, 222-226.
16. M. J. Bibb, M. J. Bibb, J. M. Ward and S. N. Cohen, *Mol. Gen. Genet.* 1985, **199**, 26-36.

17. M. A. Larkin, G. Blackshields, N. P. Brown, R. Chenna, P. A. McGettigan, H. McWilliam, F. Valentin, I. M. Wallace, A. Wilm, R. Lopez, J. D. Thompson, T. J. Gibson and D. G. Higgins, *Bioinformatics* 2007, **23**, 2947-2948.
18. P. Caffrey, *ChemBioChem.*, 2003, **4**, 654–657.
19. Y. Zhu, W. Zhang, Y. Chen, C. Yuan, H. Zhang, G. Zhang, L. Ma, Q. Zhang, X. Tian, S. Zhang and C. Zhang, *ChemBioChem.*, 2015, **14**, 2086-2093.
